# Supplementary material for: Clinical validity and reliability of the pose estimation-based system to determine spatio-temporal gait parameters in older adults: A pilot study
Source: Research Square preprint supplement (doi:10.21203/rs.3.rs-7987537/v1), 2025-11-19
Supplement: Supplementary file 1 [file 27d77360ed7e1fcbca1c089e.docx]

**Table S1.** Validity statistics of the YOLOv11 Algorithm-based system compared to G-walk system to determine spatio-temporal gait parameters in older adults

| **Parameter** | **G-walk**  **Mean±SD** | **YOLOv11 Algorithm**  **Mean±SD** | **r** | **p** | **Consistency** | **LoA%** | **Agreement** |
| --- | --- | --- | --- | --- | --- | --- | --- |
| Cadance, steps/min | 105.28±16.00 | 102.97±14 | 0.95 | <0.001* | Excellent | 19.57 | Moderate |
| Gait speed, m/s | 1.06±0.27 | 0.94±0.21 | 0.90 | <0.001* | Excellent | 47.04 | Moderate |
| Swing phase L, % GCT | 39.01±3.69 | 40.46±3.98 | 0.46 | 0.009* | Moderate | 39.36 | Moderate |
| Stance phase L, % GCT | 60.89±3.83 | 59.53±3.98 | 0.45 | 0.012* | Moderate | 26.82 | Moderate |
| First double support L, % GCT | 11.28±3.55 | 9.88±3.38 | 0.65 | <0.001* | Strong | 108.18 | Poor |
| Single support L, % GCT | 39.53±3.79 | 39.96±3.30 | 0.61 | <0.001* | Strong | 31.07 | Moderate |
| Gait cycle duration L, s | 1.18±0.17 | 1.19±0.17 | 0.92 | <0.001* | Excellent | 23.25 | Moderate |
| Stride length L, m | 1.21±0.21 | 1.26±0.19 | 0.61 | <0.001* | Strong | 56.90 | Poor |
| Swing phase R, % GCT | 39.75±3.97 | 40.01±3.38 | 0.49 | 0.005* | Moderate | 36.86 | Moderate |
| Stance phase R, % GCT | 60.57±4.31 | 59.98±3.38 | 0.44 | 0.013* | Moderate | 26.92 | Moderate |
| First double support R, % GCT | 9.44±2.79 | 10.25±3.83 | 0.48 | 0.006* | Moderate | 138.49 | Poor |
| Single support R, % GCT | 39.56±3.85 | 40±3.84 | 0.24 | 0.188 | Poor | 46.61 | Moderate |
| Gait cycle duration R, s | 1.15±0.17 | 1.18±0.16 | 0.95 | <0.001* | Excellent | 16.75 | Moderate |
| Stride length R, m | 1.19±0.19 | 1.21±0.17 | 0.72 | <0.001* | Strong | 42.46 | Moderate |

***Abbreviations:*** SD, standard deviation; LoA, Limit of agreement; GCT, Gait cycle time; r, Pearson correlation coefficient; *p<0.05 in Pearson correlation analysis.

**Table S2.** The reliabilityanalysis of YOLOv11 algorithm-based systemdetermining spatio-temporal characteristics of gait in older adults

| **Parameter** | **YOLOv11 TestMean±SD** | **YOLOv11 Retest**  **Mean±SD** | **95% CI** | | **ICC** | **Interpretation** | **p** |
| --- | --- | --- | --- | --- | --- | --- | --- |
| **Lower** | **Upper** |
| Cadance, steps/min | 102.97±14 | 105.12±13.64 | 0.84 | 0.96 | 0.92 | Excellent | <0.001* |
| Gait speed, m/s | 0.94±0.21 | 0.98±0.21 | 0.82 | 0.96 | 0.91 | Excellent | <0.001* |
| Swing phase L, % GCT | 40.46±3.98 | 40.48±3.41 | 0.01 | 0.77 | 0.53 | Moderate | 0.024* |
| Stance phase L, % GCT | 59.53±3.98 | 59.51±3.41 | 0.01 | 0.77 | 0.53 | Moderate | 0.024* |
| First double support L, % GCT | 9.88±3.38 | 8.87±3.57 | 0.34 | 0.84 | 0.68 | Moderate | 0.001* |
| Single support L, % GCT | 39.96±3.30 | 41.01±3.55 | 0.37 | 0.85 | 0.69 | Moderate | 0.001* |
| Gait cycle duration L, s | 1.19±0.17 | 1.15±0.14 | 0.76 | 0.95 | 0.89 | Good | <0.001* |
| Stride length L, m | 1.26±0.19 | 1.27±0.19 | 0.76 | 0.95 | 0.89 | Good | <0.001* |
| Swing phase R, % GCT | 40.01±3.38 | 41.01±3.56 | 0.20 | 0.81 | 0.60 | Moderate | 0.006* |
| Stance phase R, % GCT | 59.98±3.38 | 58.98±3.56 | 0.04 | 0.77 | 0.54 | Moderate | 0.020* |
| First double support R, % GCT | 10.25±3.83 | 10.27±2.90 | -0.21 | 0.72 | 0.43 | Poor | 0.071 |
| Single support R, % GCT | 40±3.84 | 39.78±3.17 | -0.32 | 0.70 | 0.37 | Poor | 0.108 |
| Gait cycle duration R, s | 1.18±0.16 | 1.16±0.14 | 0.75 | 0.94 | 0.88 | Good | <0.001* |
| Stride length R, m | 1.21±0.17 | 1.26±0.15 | 0.67 | 0.93 | 0.86 | Good | <0.001* |

***Abbreviations:*** SD, standard deviation; CI, confidence interval; ICC, Intra-class correlation coefficient; GCT, Gait cycle time; * p<0.05 in reliability analysis.

| **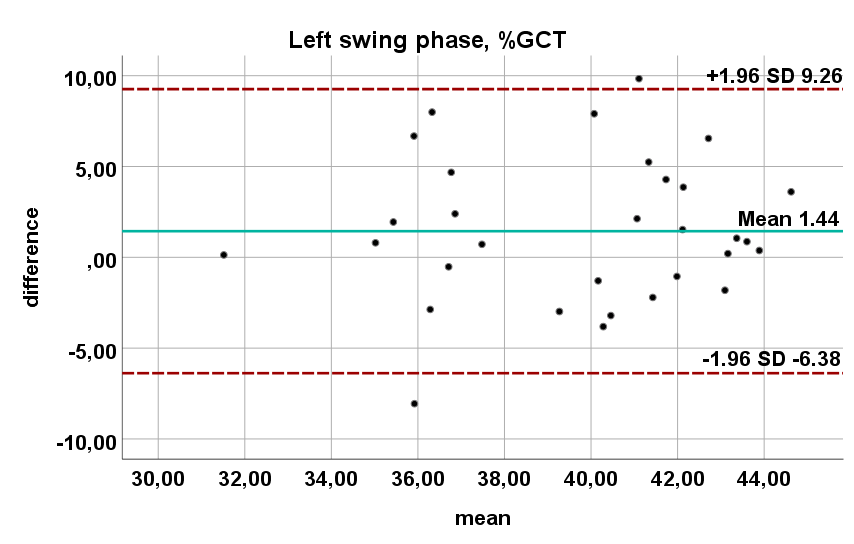** | **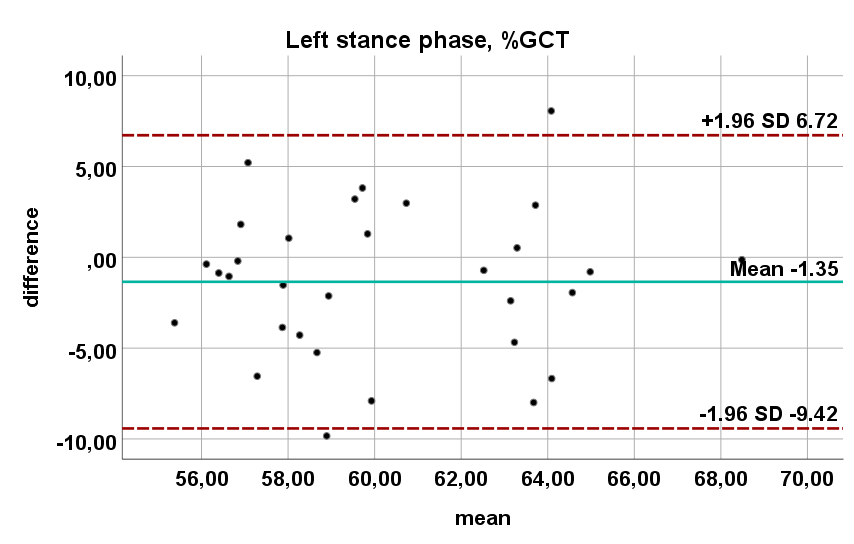** | **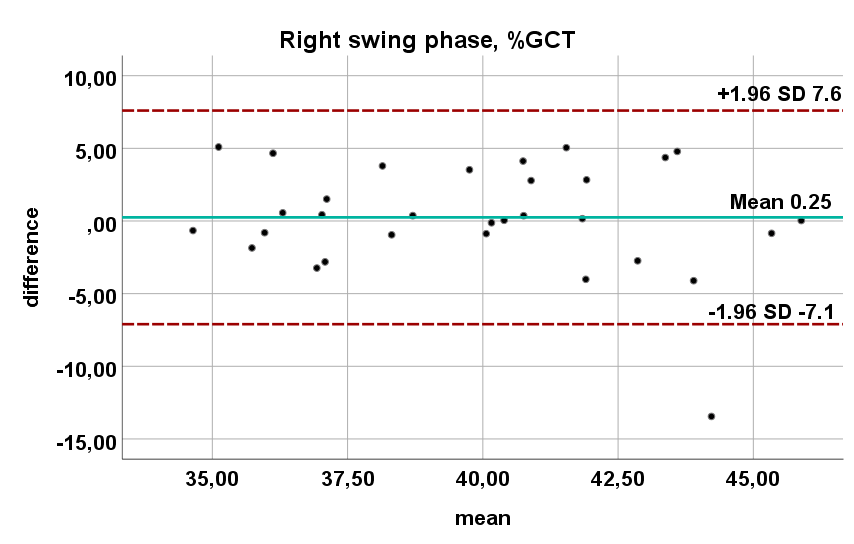** | **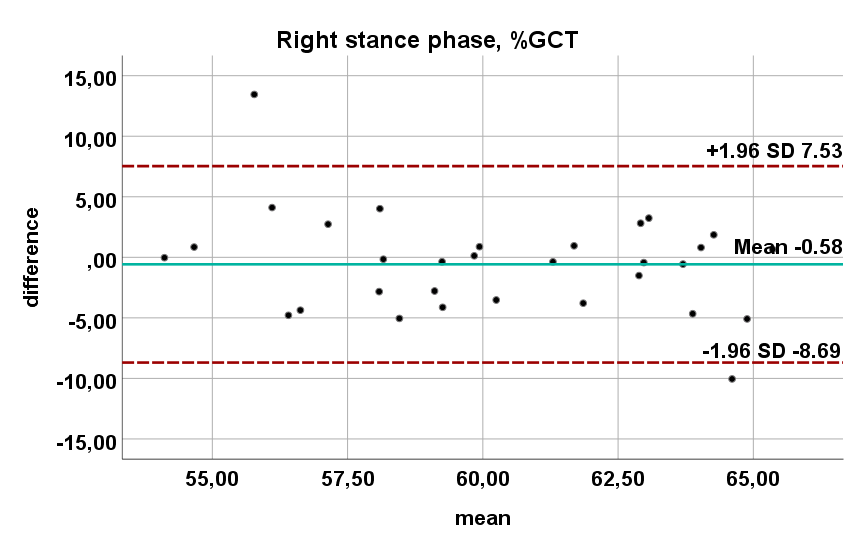** |
| --- | --- | --- | --- |
| **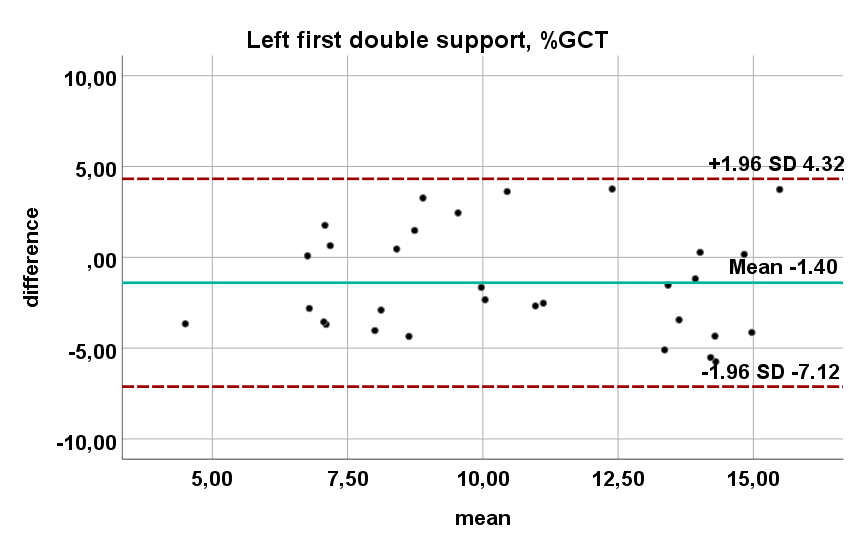** | **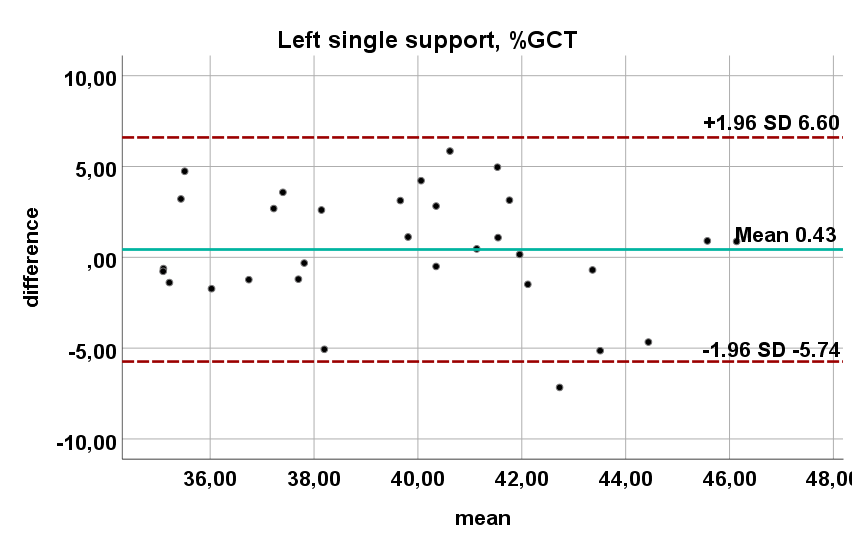** | **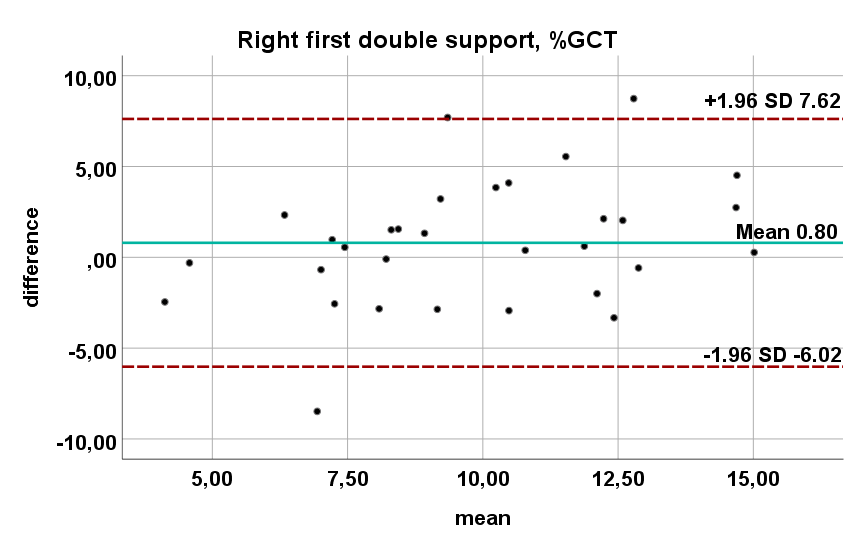** | **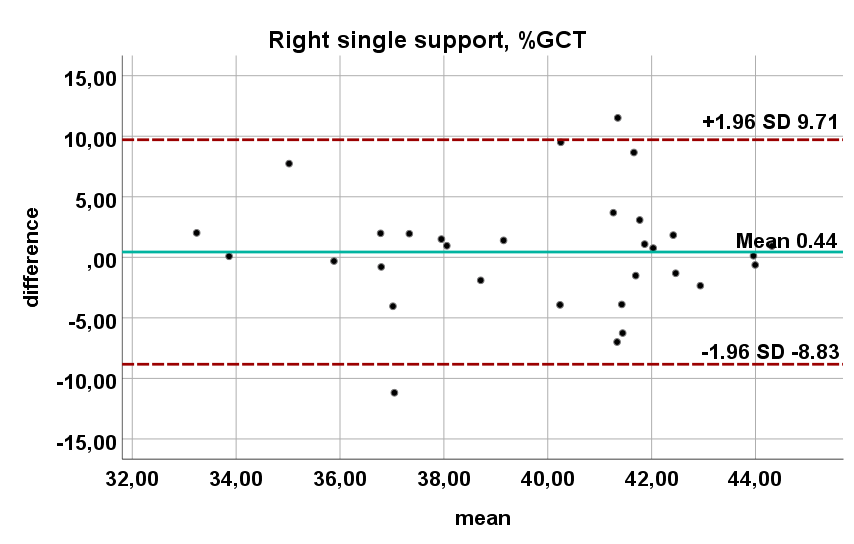** |
| **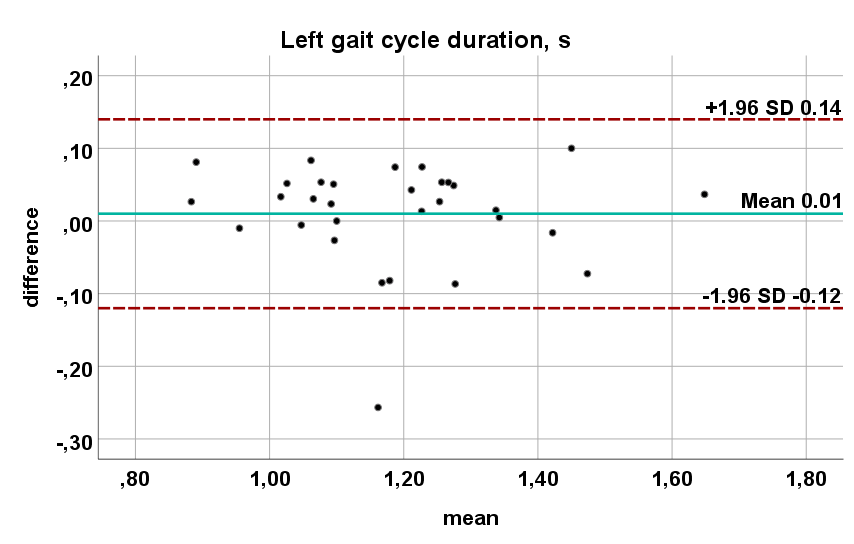** | **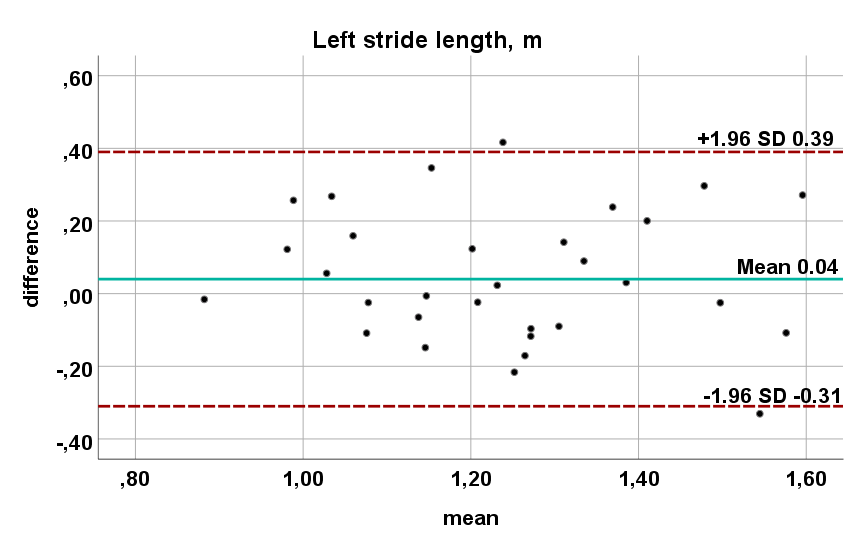** | **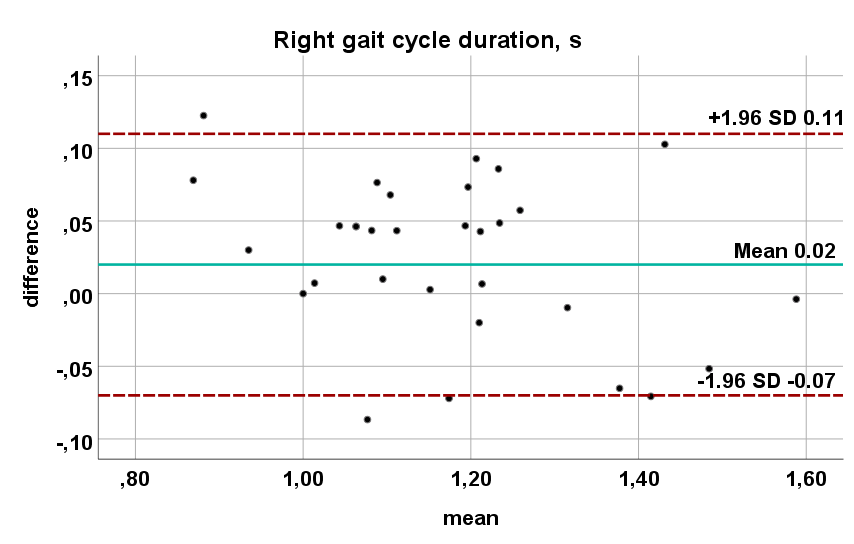** | **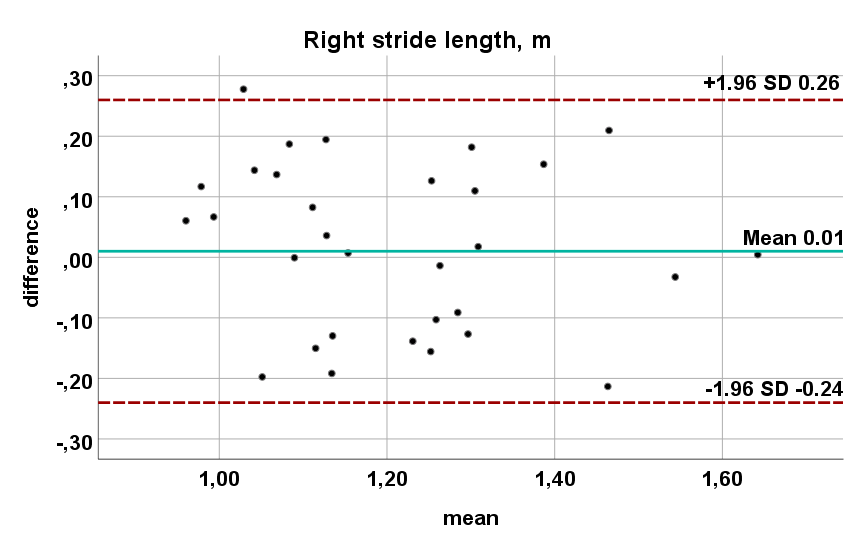** |

**Figure S1.** The agreement analysis between the YOLOv11algorithm-based system and the G-walk system
